# Supplementary material for: Determination of Genetic Distance, Genome Size and Chromosome Numbers to Support Breeding in Ornamental Lavandula Species
Source: MDPI journal article supplement (doi:10.3390/agronomy11112173), 2021-10-28
Supplement: s1 [file s1]

**Table S1.** Overview of the collected *Lavandula* genotypes, the assigned code and acquisition source with IPEN-code or serial number in parentheses when available.

| <i>Lavandula</i> genotype                          | Code | Source of acquisition                                             |
|----------------------------------------------------|------|-------------------------------------------------------------------|
| <b>Section <i>Lavandula</i></b>                    |      |                                                                   |
| <i>L. angustifolia</i>                             | L16  | Bastin Nursery <sup>1</sup>                                       |
| <i>L. angustifolia</i> 'Arctic Snow'               | L19  | Bastin Nursery                                                    |
| <i>L. angustifolia</i> 'Nana Alba'                 | L20  | Bastin Nursery                                                    |
| <i>L. angustifolia</i> 'Little Lady'               | L21  | Bastin Nursery                                                    |
| <i>L. angustifolia</i> 'Elizabeth'                 | L23  | Bastin Nursery                                                    |
| <i>L. angustifolia</i> 'Havanna Dark'              | L24  | Bastin Nursery                                                    |
| <i>L. angustifolia</i> 'Coconut Ice'               | L25  | Bastin Nursery                                                    |
| <i>L. angustifolia</i> 'Pacific Blue'              | L26  | Bastin Nursery                                                    |
| <i>L. angustifolia</i> 'Lavenite Petite'           | L32  | Bastin Nursery                                                    |
| <i>L. angustifolia</i> 'Blue Chip'                 | L33  | Bastin Nursery                                                    |
| <i>L. angustifolia</i> 'Hidcote'                   | L57  | Rose Saatzucht <sup>2</sup>                                       |
| <i>L. angustifolia</i>                             | L60  | Ghent University Botanic garden <sup>3</sup><br>(XX0GENT19000307) |
| <i>L. angustifolia</i> 'Rosea'                     | L68  | Guido Van de Steen Nursery <sup>4</sup>                           |
| <i>L. angustifolia</i> 'Munstead'                  | L69  | Guido Van de Steen Nursery                                        |
| <i>L. angustifolia</i> 'Lavenize Elegance'         | L76  | Bastin Nursery                                                    |
| <i>L. angustifolia</i> 'Lavenize Liliput'          | L77  | Bastin Nursery                                                    |
| <i>L. angustifolia</i> 'Lavenize Pom Pom'          | L78  | Bastin Nursery                                                    |
| <i>L. angustifolia</i>                             | L98  | IPK <sup>5</sup>                                                  |
| <i>L. angustifolia</i>                             | L100 | IPK                                                               |
| <i>L. angustifolia</i> 'Hidcote'                   | L103 | PWS <sup>6</sup>                                                  |
| <i>L. angustifolia</i> subsp. <i>pyrenaica</i>     | L62  | CJBG (FR0G20016241) <sup>7</sup>                                  |
| <i>L. angustifolia</i> subsp. <i>pyrenaica</i>     | L107 | University of Vienna Botanic Garden <sup>8</sup>                  |
| <i>L. latifolia</i>                                | L5   | Bastin Nursery                                                    |
| <i>L. latifolia</i>                                | L35  | Meise Botanic Garden (XX0BR10000920) <sup>9</sup>                 |
| <i>L. latifolia</i>                                | L67  | CJBG (IT0G19926251)                                               |
| <i>L. latifolia</i> 'Fuenteroyos'                  | L84  | Bastin Nursery                                                    |
| <i>L. latifolia</i> .                              | L97  | IPK                                                               |
| <i>L. latifolia</i>                                | L101 | IPK                                                               |
| <i>L. latifolia</i> 'Muffets' Children'            | L105 | PWS                                                               |
| <i>L. lanata</i>                                   | L108 | University of Vienna Botanic Garden                               |
| <i>L. lanata</i>                                   | L112 | CJBG (XX0G199986952)                                              |
| <b>Section <i>Dentatae</i></b>                     |      |                                                                   |
| <i>L. dentata</i> var. <i>candicans</i>            | L3   | Bastin Nursery                                                    |
| <i>L. dentata</i> 'Ploughman's Blue'               | L4   | Bastin Nursery                                                    |
| <i>L. dentata</i> 'Iminifri'                       | L6   | Bastin Nursery                                                    |
| <i>L. dentata</i> 'Adrar Mkorn'                    | L7   | Bastin Nursery                                                    |
| <i>L. dentata</i> var. <i>candicans</i> 'Cap Rihr' | L10  | Bastin Nursery                                                    |
| <i>L. dentata</i> 'Evermore Blue'                  | L18  | Bastin Nursery                                                    |
| <i>L. dentata</i>                                  | L63  | CJBG (XX0G20110009)                                               |
| <b>Section <i>Stoechas</i></b>                     |      |                                                                   |
| <i>L. pedunculata</i> 'Papillon'                   | L15  | Bastin Nursery                                                    |
| <i>L. pedunculata</i> 'Papillon'                   | L34  | Bastin Nursery                                                    |

|                                           |      |                                     |
|-------------------------------------------|------|-------------------------------------|
| <i>L. stoechas</i> 'Boysenberry Ruffles'  | L14  | Bastin Nursery                      |
| <i>L. stoechas</i> 'Kew Red'              | L27  | Bastin Nursery                      |
| <i>L. stoechas</i> 'Otto Quast'           | L28  | Bastin Nursery                      |
| <i>L. stoechas</i> 'Papillon'             | L74  | Guido Van de Steen Nursery          |
| <i>L. stoechas</i> 'Madrid Blue'          | L80  | Bastin Nursery                      |
| <i>L. stoechas</i> 'Libelle Purple'       | L81  | Bastin Nursery                      |
| <i>L. stoechas</i> 'Ever Great Blue'      | L82  | Bastin Nursery                      |
| <i>L. stoechas</i> 'Libelle Compact'      | L83  | Bastin Nursery                      |
| <i>L. stoechas</i>                        | L102 | USDA (PI516602) <sup>10</sup>       |
| <i>L. stoechas</i> 'Van Goghs' Babies'    | L104 | PWS                                 |
| <i>L. stoechas</i> 'Bandera Purple'       | L111 | Geert De Smet Nursery <sup>11</sup> |
| <i>L. stoechas</i> subsp. <i>luisieri</i> | L113 | CJBG (XX0G20140601)                 |
| <i>L. stoechas</i>                        | L122 | CJBG (FR0G20120236)                 |
| <i>L. stoechas</i>                        | L128 | USDA (PI516603)                     |

### Section *Pterostoechas*

|                        |      |                                                    |
|------------------------|------|----------------------------------------------------|
| <i>L. antineae</i>     | L118 | Cambridge University Botanic Garden <sup>12</sup>  |
| <i>L. canariensis</i>  | L94  | Meise Botanic Garden (XX0BR2004106589)             |
| <i>L. canariensis</i>  | L119 | Botanic Garden of the Canary Islands <sup>13</sup> |
| <i>L. maroccana</i>    | L95  | IPK                                                |
| <i>L. multifida</i>    | L12  | Bastin Nursery                                     |
| <i>L. multifida</i>    | L96  | IPK                                                |
| <i>L. multifida</i>    | L126 | University of Vienna Botanic Garden                |
| <i>L. pubescens</i>    | L99  | IPK                                                |
| <i>L. pubescens</i>    | L115 | Millennium Seed Bank (30771) <sup>14</sup>         |
| <i>L. pubescens</i>    | L116 | Millennium Seed Bank (142816)                      |
| <i>L. pubescens</i>    | L117 | Millennium Seed Bank (706737)                      |
| <i>L. rotundifolia</i> | L121 | Cambridge University Botanic Garden                |

### Section *Subnudae*

|                   |      |                               |
|-------------------|------|-------------------------------|
| <i>L. subnuda</i> | L114 | Millennium Seed Bank (101642) |
|-------------------|------|-------------------------------|

### Intrasectional hybrids

|                                            |     |                            |
|--------------------------------------------|-----|----------------------------|
| <i>L. × intermedia</i> 'Nizza'             | L1  | Bastin Nursery             |
| <i>L. × intermedia</i> 'Old English Group' | L29 | Bastin Nursery             |
| <i>L. × intermedia</i> 'Heavenly Angel'    | L30 | Bastin Nursery             |
| <i>L. × intermedia</i> 'Edelweiss'         | L31 | Bastin Nursery             |
| <i>L. × intermedia</i> 'Dutch'             | L72 | Guido Van de Steen Nursery |
| <i>L. × intermedia</i> 'Silver'            | L73 | Guido Van de Steen Nursery |
| <i>L. × intermedia</i> 'Futura'            | L86 | Bastin Nursery             |
| <i>L. × losae</i>                          | L2  | Bastin Nursery             |
| <i>L. × chaytorae</i> 'Gorgeous'           | L8  | Bastin Nursery             |
| <i>L. × chaytorae</i> 'Richard Gray'       | L22 | Bastin Nursery             |

### Intersectional hybrids

|                                              |     |                |
|----------------------------------------------|-----|----------------|
| <i>L. × gingsinsii</i> 'Goodwin Creek Grey'  | L9  | Bastin Nursery |
| <i>L. × allardii</i> 'African Pride'         | L11 | Bastin Nursery |
| <i>L. × heterophylla</i> 'Big Boy James'     | L13 | Bastin Nursery |
| <i>L. × heterophylla</i> 'Devantville Cuche' | L17 | Bastin Nursery |
| <i>L. × heterophylla</i> 'Meerlo'            | L75 | Bastin Nursery |

<sup>1</sup> Bastin Nursery ('Kwekerij Bastin'), Aalbeek, Netherlands

<sup>2</sup> Rose Saatzucht, Erfurt, Germany

<sup>3</sup> University Ghent Botanic Garden, Ghent, Belgium

<sup>4</sup> Guido Van de Steen Nursery, Wetteren, Belgium

<sup>5</sup> IPK: Leibniz Institute of Plant Genetics and Crop Plant Research, Gatersleben, Germany

<sup>6</sup> PWS: Plant World Seeds, Newton Abbot, United Kingdom

<sup>7</sup> CJBG: Conservatory and Botanic Gardens of Geneva, Pregny-Chambésy, Switzerland

<sup>8</sup> University of Vienna Botanical Garden, Vienna, Austria

<sup>9</sup> Meise Botanic Garden, Meise, Belgium

<sup>10</sup> USDA: United States Department of Agriculture - Germplasm Resources Information Network (GRIN), United States of America

<sup>11</sup> Geert De Smet Nursery ('Siergrassen Geert De Smet'), Wetteren, Belgium

<sup>12</sup> Cambridge University Botanic Garden, Cambridge, United Kingdom

<sup>13</sup> Botanic Garden of the Canary Islands 'Viera y Clavijo', Las Palmas, Gran Canaria, Spain

<sup>14</sup> Millennium Seed Bank, Royal Botanic Gardens Kew, Richmond, United Kingdom

**Table S2.** Overview of the presumed misnamed genotypes in the collection and their assumptive correct names. Assumptions were based on 4 parameters: AFLP data (phylogenetic tree and/or PCoA), chromosome numbers, genome size and morphological observation described in Upson and Andrews [3]. Fields demarked with ‘x’ indicate parameters that support the proposed genotype name. N.a. = not applicable. Taxonomical classification was not in the scope and capability of our study, hence undisputable conclusions on the misnaming of genotypes could not be drawn and only propositions for correct names were given.

| Code | Current genotype name                   | Proposed genotype name                     | Phylogenetic tree and/or PCoA | Chromosome number | Genome size | Supportive morphological observation                                                                                                                                                                             |
|------|-----------------------------------------|--------------------------------------------|-------------------------------|-------------------|-------------|------------------------------------------------------------------------------------------------------------------------------------------------------------------------------------------------------------------|
| L95  | <i>L. maroccana</i>                     | <i>L. multifida</i>                        | x                             | n.a.              | n.a.        | Presence of a unique stem indumentum of long white hairs and a characteristic twist in the flower spike, typical for <i>L. multifida</i>                                                                         |
| L74  | <i>L. stoechas</i> ‘Papillon’           | <i>L. pedunculata</i> ‘Papillon’           | x                             | n.a.              | n.a.        | Presence of long flower stalks and blunt fertile bracts, distinguishing <i>L. pedunculata</i> from <i>L. stoechas</i>                                                                                            |
| L128 | <i>L. stoechas</i>                      | <i>L. pedunculata</i>                      | x                             | n.a.              | n.a.        | Presence of long flower stalks and blunt fertile bracts, distinguishing <i>L. pedunculata</i> from <i>L. stoechas</i>                                                                                            |
| L104 | <i>L. stoechas</i> ‘Van Gogh’s Babies’  | <i>L. angustifolia</i> ‘Van Gogh’s Babies’ | x                             | x                 | x           | Absence of apical bracts distinguishing <i>L. angustifolia</i> from <i>L. stoechas</i> , and the absence of bracteoles distinguishing <i>L. angustifolia</i> from <i>L. latifolia</i> and <i>L. × intermedia</i> |
| L105 | <i>L. latifolia</i> ‘Muffet’s Children’ | <i>L. angustifolia</i> ‘Muffet’s Children’ | x                             | x                 | x           | Absence of bracteoles distinguishing <i>L. angustifolia</i> from <i>L. latifolia</i> and <i>L. × intermedia</i>                                                                                                  |
| L73  | <i>L. × intermedia</i> ‘Silver’         | <i>L. angustifolia</i> ‘Silver’            | x                             | n.a.              | x           | Absence of bracteoles distinguishing <i>L. angustifolia</i> from <i>L. latifolia</i> and <i>L. × intermedia</i>                                                                                                  |

**Figure S3.** Computer code (R Studio script) for constructing a dendrogram (1) and PCoA analysis (2).

```
#install packages needed

install.packages(c("Rcmdr","RODBC","lsmeans","nlme","lme4","boot","psych","corrgram"),dependencies=TRUE)
install.packages(c("ape","openxlsx","pvclust", "vegan"))

library("Rcmdr")
library("corrgram")
library("RODBC")
library("psych")
library("lsmeans")
library("nlme")
library("lme4")
library("boot")
library("plotrix")
library("stats")
require(PMCMR)
library("vegan")
library("ape")
library("openxlsx")
library('pvclust')

## 1. Dendrogram

#import binary AFLP data
my_tree_data <- read.xlsx("AFLP_data_manuscript_Lavandula_Van Oost et al..xlsx", sheet = 2, startRow = 1, colNames
= TRUE, rowNames = TRUE)

#Create dissimilarity matrix using euclidean squared distances
dist.mat<-vegdist(my_tree_data, method="euclidean", binary = TRUE)
```

```
#for UPGMA clustering, use 'average' methode
clust.res<-hclust(dist.mat, method="average")
```

```
#Plot the dendrogram
plot(as.phylo(rotate(clust.res, c(1:40,42:68,41))), cex = 0.73, label.offset = 0.7)
```

```
#Bootstrapping (1000 replicates) on transposed euclidean squared distance matrix. Use UPGMA clustering ('average')
transmy_tree_data <- t(my_tree_data)
fit <- pvclust(transmy_tree_data, method.dist="euclidean", method.hclust="average", use.cor= "all.obs",nboot=1000)
```

```
#create new dendrogram with bootstrapvalues (green color 'bp') to support the typology of the dendrogram
plot(fit, hang=-1)
```

## ## 2. Principal Coordinate Analysis (PCoA)

```
#import binary AFLP data
my_PCOA_data <- read.xlsx("AFLP_data_manuscript_Lavandula_Van Oost et al..xlsx", sheet = 1, startRow = 1, colNames
= TRUE, rowNames = TRUE)
```

```
#exclude outgroup Ocimum basilicum from PCoA analysis
my_PCOA_data <- my_PCOA_data[2:dim(my_PCOA_data)[1],]
```

```
#Create dissimilarity matrix using euclidean squared distances
dist.mat<-vegdist(my_PCOA_data, method="euclidean", binary = TRUE)
```

```
#perform Principal Coordinate analysis on the dissimilarity matrix
res <- pcoa(dist.mat)
```

```
#display eigenvalues (~ percentage of variation explained)
res$values$Relative_eig
```

```
#Plot the PCoA analysis  
biplot(res)
```

```
#inkscape software was used for additional adjustments to lay-out
```

**Table S4.** AFLP data file (Excel)

Data can be found in supplementary Excel-file 'AFLP\_data\_manuscript\_Lavandula\_Van Oost et al..xlsx'
